# Supplementary material for: Achieving real Ohmic contact by the dual protection of outer layer atoms and surface functionalization in 2D metal Mxenes/MoSi2N4 heterostructures
Source: Royal Society of Chemistry journal article supplement (doi:10.1039/d3tc00739a), 2023-01-01
Supplement: d3tc00739a1.pdf [file d3tc00739a1.pdf]

## Supporting Information

### **Achieving real Ohmic contact by the dual protection of outer layer atoms and surface functionalization in 2D metal**

#### **Mxenes/MoSi<sub>2</sub>N<sub>4</sub> heterostructures**

X. He,<sup>1</sup> W. Z. Li,<sup>1</sup> Z. Gao,<sup>1</sup> Z. H. Zhang,<sup>2</sup> Y. He<sup>1,\*</sup>

<sup>1</sup>*Department of Physics, Yunnan University, Kunming 650091, People's Republic of  
China.*

<sup>2</sup>*Hunan Provincial Key Laboratory of Flexible Electronic Materials Genome  
Engineering, Changsha University of Science and Technology, Changsha 410114,  
China.*

\* Corresponding author and E-mail: [yhe@ynu.edu.cn](mailto:yhe@ynu.edu.cn)

**Table S1.**  $W_M$  represents the work function of 2D metal Mxenes.  $\Delta V$  represents the potential step.  $\Delta Q$  represents the number of charges transferred by Mxenes after contact, where "-" represents the loss of charge of Mxenes.  $\omega_{TB}$  and  $\Phi_{TB}$  respectively represent the width and height of tunneling barrier,  $\Phi_{Bp}$  and  $\Phi_{Bn}$  are the SBH of hole and electron, where OC represents the ohmic contact.

|                                                              | $W_M$ | $\Delta V$ | $\Delta Q( e )$ | $\omega_{TB}$ | $\Phi_{TB}$ | $\Phi_{Bp}$ | $\Phi_{Bn}$ |
|--------------------------------------------------------------|-------|------------|-----------------|---------------|-------------|-------------|-------------|
| Ti <sub>4</sub> C <sub>3</sub>                               | 4.067 | -0.58      | -0.161          | 0.245         | 0.124       | 1.393       | OC(-0.396)  |
| Ti <sub>4</sub> C <sub>3</sub> F <sub>2</sub>                | 4.742 | -0.001     | -0.008          | 2.037         | 4.057       | 0.473       | 0.639       |
| Ti <sub>4</sub> C <sub>3</sub> O <sub>2</sub>                | 6.087 | 0.523      | 0.032           | 1.967         | 5.002       | OC(-0.17)   | 1.791       |
| Ti <sub>4</sub> C <sub>3</sub> O <sub>2</sub> H <sub>2</sub> | 1.893 | -1.01      | -0.158          | 0.603         | 0.684       | 1.483       | OC(-0.446)  |
| V <sub>4</sub> C <sub>3</sub>                                | 4.55  | -0.672     | -0.146          | 0.182         | 0.106       | 1.779       | OC(-0.151)  |
| V <sub>4</sub> C <sub>3</sub> F <sub>2</sub>                 | 5.782 | -0.019     | 0.017           | 2.044         | 5.015       | 0.1         | 1.445       |
| V <sub>4</sub> C <sub>3</sub> O <sub>2</sub>                 | 6.624 | -0.95      | 0.035           | 2.023         | 5.573       | OC(-0.085)  | 1.657       |
| V <sub>4</sub> C <sub>3</sub> O <sub>2</sub> H <sub>2</sub>  | 1.787 | 1.315      | -0.144          | 0.68          | 0.637       | 1.913       | OC(-0.375)  |
| Zr <sub>4</sub> C <sub>3</sub>                               | 4.408 | -0.768     | -0.631          | 0             | 0           | 2.366       | OC(-0.813)  |
| Zr <sub>4</sub> C <sub>3</sub> F <sub>2</sub>                | 3.573 | 0.164      | -0.164          | 1.626         | 2.866       | 1.879       | OC(-0.164)  |
| Zr <sub>4</sub> C <sub>3</sub> O <sub>2</sub>                | 5.35  | -0.007     | 0.008           | 1.847         | 4.511       | 0.098       | 1.753       |
| Zr <sub>4</sub> C <sub>3</sub> O <sub>2</sub> H <sub>2</sub> | 2.158 | 0.986      | -0.533          | 0.749         | 0.716       | 2.281       | OC(-0.561)  |
| Nb <sub>4</sub> C <sub>3</sub>                               | 4.348 | -1.016     | -0.456          | 0             | 0           | 2.418       | OC(-0.109)  |
| Nb <sub>4</sub> C <sub>3</sub> F <sub>2</sub>                | 4.989 | 0.013      | -0.013          | 1.733         | 3.901       | 0.97        | 1.217       |
| Nb <sub>4</sub> C <sub>3</sub> O <sub>2</sub>                | 5.757 | -0.015     | 0.026           | 1.768         | 4.723       | 0.075       | 2.217       |
| Nb <sub>4</sub> C <sub>3</sub> O <sub>2</sub> H <sub>2</sub> | 1.818 | 1.15       | -0.366          | 0.856         | 0.902       | 2.489       | OC(-0.065)  |
| Hf <sub>4</sub> C <sub>3</sub>                               | 4.526 | -0.742     | -0.705          | 0             | 0           | 2.711       | OC(-0.915)  |
| Hf <sub>4</sub> C <sub>3</sub> F <sub>2</sub>                | 3.079 | 0.249      | -0.167          | 1.283         | 2.304       | 1.921       | OC(-0.118)  |
| Hf <sub>4</sub> C <sub>3</sub> O <sub>2</sub>                | 5.39  | -0.074     | 0.036           | 1.493         | 3.981       | 0.543       | 1.5         |
| Hf <sub>4</sub> C <sub>3</sub> O <sub>2</sub> H <sub>2</sub> | 2.5   | 1.101      | -0.591          | 0.487         | 0.419       | 2.174       | OC(-0.284)  |



**Fig. S1** The projected band structure, projected density of states(The red dots represent  $\text{MoSi}_2\text{N}_4$  and the grey dots represent Mxenes), 2D/3D charge density difference and effective potential of the 2D metal Mxenes/ $\text{MoSi}_2\text{N}_4$  heterostructures.
